# Supplementary material for: Prokaryotic community structure and key taxa in the Arabian Sea’s oxygen minimum zone
Source: Frontiers journal article supplement (doi:10.3389/fmars.2024.1380819), 2024-05-21
Supplement: Table_1.xlsx [file Table_1.xlsx]

## Sheet: Supplementary Table 1
Supplementary Table 1: Sampling information, physical and chemical parameters and nutrient table
Sample_id	Group	Sea area	Station_id	Depth (m)	Deepest (m)	Sampling_time (Y.M.D)	Latitude (°N)	Longitude (°E)	Filtration_volume	Salinity (PSU)	DO (μM)	Temperature (℃)	PO4 (μmol/L)	SiO4 (μmol/L)	NO3 (μmol/L)	NO2 (μmol/L)	NH4 (μmol/L)
CTD03_62	AS_UP	AS	CTD03	62	3777	2022.05.20	15.9601	64.3901	8L	36.4468	184.35	27.1551	0.152	4.6	2.8364	0.4678	1.31471
CTD06_62	AS_UP	AS	CTD06	62	4182	2022.05.24	12.9961	68.304	8L	36.3142	171.919	26.9335	0.105	4.488	3.5775	0.5106	1.27118
CTD02_75	AS_UP	AS	CTD02	75	4252	2022.05.17	11.7966	66.6895	8L	36.1845	205.453	26.9884	0.465	4.39492	0	0.0409	0.575
CTD04_75	AS_UP	AS	CTD04	75	3550	2022.05.21	17.3268	64.689	8L	36.2212	158.109	25.0969	0.697	9.26949	4.8086	0.0743	0.29
CTD05_75	AS_UP	AS	CTD05	75	3864	2022.05.23	15.6586	66.6716	8L	36.4548	186	25.9486	0.069	3.68	2.9954	0.5748	2.88353
CTD02_100	AS_UP	AS	CTD02	100	4252	2022.05.17	11.7966	66.6895	8L	36.2384	183.963	25.5549	0.471	4.02542	6.884	0.7153	0.453
CTD05_100	AS_UP	AS	CTD05	100	3864	2022.05.23	15.6586	66.6716	8L	36.1657	52.6656	23.3499	0.923	9.824	16.3289	0.2661	1.23647
CTD03_100	AS_OMZ	AS	CTD03	100	3777	2022.05.20	15.9601	64.3901	8L	36.0376	22.1188	23.2203	1.577	14.696	22.763	0.2338	2.02176
CTD05_125	AS_OMZ	AS	CTD05	125	3864	2022.05.23	15.6586	66.6716	8L	35.9128	12.1844	21.0649	1.51	15.695	22.3165	0.4132	0.838235
CTD06_125	AS_OMZ	AS	CTD06	125	4182	2022.05.24	12.9961	68.304	8L	35.6559	17.8625	19.7941	1.286	15.917	17.6148	0.205	1.12235
CTD03_150	AS_OMZ	AS	CTD03	150	3777	2022.05.20	15.9601	64.3901	8L	35.6614	0	19.3178	1.998	25.427	24.7503	0.3181	1.28
CTD06_150	AS_OMZ	AS	CTD06	150	4182	2022.05.24	12.9961	68.304	8L	35.5823	12.6531	18.2388	1.713	24.629	22.251	0.1167	1.64706
CTD02_150	AS_OMZ	AS	CTD02	150	4252	2022.05.17	11.7966	66.6895	8L	35.8126	11.8406	20.4108	1.605	11.6725	13.159	0.0401	1.032
CTD03_200	AS_OMZ	AS	CTD03	200	3777	2022.05.20	15.9601	64.3901	8L	35.9722	0	17.7479	2.145	31.17	22.4287	0.622	1.62529
CTD04_200	AS_OMZ	AS	CTD04	200	3550	2022.05.21	17.3268	64.689	8L	35.9704	0	19.04	1.642	16.2716	18.1486	0.0612	1.195
CTD05_200	AS_OMZ	AS	CTD05	200	3864	2022.05.23	15.6586	66.6716	8L	35.8332	4.3688	17.045	2.039	30.238	27.8528	0.3672	1.17529
CTD06_200	AS_OMZ	AS	CTD06	200	4182	2022.05.24	12.9961	68.304	8L	35.4975	10.7125	15.8932	1.974	31.493	24.9724	0.1409	2.26
CTD02_300	AS_OMZ	AS	CTD02	300	4252	2022.05.17	11.7966	66.6895	8L	35.5258	17.6375	13.6736	1.955	25.775	13.788	0.0293	1.22
CTD03_300	AS_OMZ	AS	CTD03	300	3777	2022.05.20	15.9601	64.3901	8L	35.8676	0	14.7234	2.111	36.354	24.748	3.7127	1.53941
CTD06_300	AS_OMZ	AS	CTD06	300	4182	2022.05.24	12.9961	68.304	8L	35.4189	11.7188	13.3683	1.773	32.421	25.4657	0.1449	1.32059
CTD02_500	AS_OMZ	AS	CTD02	500	4252	2022.05.17	11.7966	66.6895	8L	35.4325	14.1656	11.5732	2.407	44.4826	29.623	0.0526	1.195
CTD03_500	AS_OMZ	AS	CTD03	500	3777	2022.05.20	15.9601	64.3901	8L	35.6375	0	12.2415	2.032	51.565	27.9323	0.1826	1.44941
CTD05_500	AS_OMZ	AS	CTD05	500	3864	2022.05.23	15.6586	66.6716	8L	35.6009	4.4938	12.1884	1.739	38.835	21.7764	0.1527	1.31824
CTD06_500	AS_OMZ	AS	CTD06	500	4182	2022.05.24	12.9961	68.304	8L	35.455	14.1938	11.7536	2.311	42.04	33.1834	0.1078	1.79294
CTD02_1000	AS_OMZ	AS	CTD02	1000	4252	2022.05.17	11.7966	66.6895	8L	35.2384	19.0813	8.0969	2.883	90.3174	37.6721	0.0276	0
CTD04_1000	AS_OMZ	AS	CTD04	1000	3550	2022.05.21	17.3268	64.689	8L	35.4086	0	9.0128	2.675	85.6903	43.6264	0.0847	0.206
CTD05_1000	AS_OMZ	AS	CTD05	1000	3864	2022.05.23	15.6586	66.6716	8L	35.3326	1.3031	8.4356	1.916	70.675	26.1578	0.2953	1.74059
CTD06_1000	AS_OMZ	AS	CTD06	1000	4182	2022.05.24	12.9961	68.304	8L	35.2221	20.975	7.8441	1.811	77.534	24.6848	0.1515	0.988235
CTD06_1500	AS_DOWN	AS	CTD06	1500	4182	2022.05.24	12.9961	68.304	8L	34.9708	54.7906	4.7948	2.545	118.042	36.8517	0.0943	0.980588
CTD03_2000	AS_DOWN	AS	CTD03	2000	3777	2022.05.20	15.9601	64.3901	8L	34.834	60.8375	3.107	2.622	145.474	37.8477	1.0507	0.904706
CTD05_2000	AS_DOWN	AS	CTD05	2000	3864	2022.05.23	15.6586	66.6716	8L	34.8137	85.675	2.8802	1.679	87.562	28.0235	0.07	1.50941
CTD06_2000	AS_DOWN	AS	CTD06	2000	4182	2022.05.24	12.9961	68.304	8L	34.8065	110.291	2.8051	2.324	139.87	36.5244	0.102	1.01412
CTD02_3000	AS_DOWN	AS	CTD02	3000	4252	2022.05.17	11.7966	66.6895	8L	34.7398	149.541	1.7861	2.1	144.467	26.5627	0.0295	0.867
CTD03_3000	AS_DOWN	AS	CTD03	3000	3777	2022.05.20	15.9601	64.3901	8L	34.7434	96.4656	1.8226	2.404	160.038	37.1416	0.1294	1.05294
CTD05_3000	AS_DOWN	AS	CTD05	3000	3864	2022.05.23	15.6586	66.6716	8L	34.7404	131.794	1.7734	1.856	120.738	28.3718	0.1397	1.11647
CTD06_3000	AS_DOWN	AS	CTD06	3000	4182	2022.05.24	12.9961	68.304	8L	34.7403	158.934	1.7787	1.963	117.844	27.9123	0.0977	1.54176
CTD02_4000	AS_DOWN	AS	CTD02	4000	4252	2022.05.17	11.7966	66.6895	8L	34.7313	170.659	1.7025	2.235	114.25	31.8933	0.0217	0.344
CTD08_1000	AS_DOWN	AS	CTD08	1000	4458	2022.05.28	10.1326	63.1034	8L	35.2494	148.975	8.0966	2.356	75.832	32.1173	0.1251	1.52353
CTD08_87	CK	AS	CTD08	87	4458	2022.05.28	10.1326	63.1034	8L	35.9342	206.166	27.6518	0.476	5.88	5.6373	0.2646	0.727647
CTD08_150	CK	AS	CTD08	150	4458	2022.05.28	10.1326	63.1034	8L	35.8701	74.6688	21.5376	1.735	17.232	22.5245	0.1038	0.886471
CTD08_250	CK	AS	CTD08	250	4458	2022.05.28	10.1326	63.1034	8L	35.3856	62.125	14.7735	1.814	26.741	25.7533	0.2177	0.831765
CTD08_500	CK	AS	CTD08	500	4458	2022.05.28	10.1326	63.1034	8L	35.4225	81.3063	11.6856	2.075	40.365	27.5395	0.2853	0.951176
CTD08_2000	CK	AS	CTD08	2000	4458	2022.05.28	10.1326	63.1034	8L	34.8051	249.184	2.8879	2.44	122.974	34.7312	0.1222	1.11765
CTD08_3000	CK	AS	CTD08	3000	4458	2022.05.28	10.1326	63.1034	8L	34.7431	305.788	1.8223	2.279	138.402	34.3244	0.1725	1.17235

## Sheet: Supplementary Table 2
Supplementary Table 2: Canonical Correspondence Analysis table of bacterial and archaeal communities
bacterial	CCA1	CCA2	r2	p_value		archaeal	CCA1	CCA2	r2	p_value
Depth	0.0286	-0.9996	0.702	0.001		Depth	0.6889	-0.7248	0.6113	0.001
DO	-0.984	-0.178	0.669	0.001		DO	-0.3767	-0.9263	0.5274	0.001
NO3	0.7443	-0.6679	0.6796	0.001		NO3	0.9895	-0.1443	0.6181	0.001
NO2	0.605	0.7962	0.2241	0.031		NO2	-0.2757	0.9612	0.0413	0.513
NH4	0.7014	0.7127	0.0842	0.217		NH4	-0.9919	0.127	0.0224	0.688

## Sheet: Supplementary Table 3
Supplementary Table 3: Spearman Correlation Heatmap table
Bacterial							Archaeal
Family	Depth	DO	NO3	NO2	NH4		Family	Depth	DO	NO3	NO2	NH4
f__Alteromonadaceae	-0.223797	0.226525	-0.177227	-0.11637	-0.302703		f__Nitrosopumilaceae	0.078082	-0.225363	0.203748	0.159333	0.173065
f__Sphingomonadaceae	0.385748	0.168093	0.325193	-0.13168	0.107784		f__norank_o__Marine_Group_II	-0.438876	0.268065	-0.446504	0.0696896	-0.0392763
f__Rhodobacteraceae	-0.073711	0.182467	-0.103853	-0.0255057	0.02413		f__norank_o__norank_c__Thermoplasmata	-0.288857	-0.262835	-0.33662	0.366321	0.099768
f__Microtrichaceae	-0.433283	-0.533976	-0.23853	0.514977	0.460663		f__Nitrososphaeraceae	0.0913591	0.255174	0.0934253	-0.356342	-0.25955
f__Moraxellaceae	0.221311	0.107746	0.146888	-0.312949	0.15557		f__norank_o__Marine_Benthic_Group_A	0.0625317	-0.621455	0.0788232	0.250829	0.460372
f__Saccharospirillaceae	-0.0617036	-0.103942	-0.0423714	0.350594	0.16726		f__norank_o__norank_c__Bathyarchaeia	0.0554518	-0.323671	0.0828667	0.143968	0.357525
f__Thalassospiraceae	0.0152904	-0.199347	0.189104	0.180271	0.216293		f__Methanosarcinaceae	0.0174119	0.138682	0.089014	-0.182186	0.185102
f__Flavobacteriaceae	-0.117221	0.307254	-0.0972906	-0.0116279	0.0555621		f__Methanobacteriaceae	0.067636	0.073719	0.0869805	-0.130001	0.0566556
f__norank_o__norank_c__norank_p__Marinimicrobia_SAR406_clade	-0.259741	-0.615476	-0.0956848	0.439653	0.429352		f__Haloferacaceae	0.0496188	0.267038	-0.0398708	0.169943	-0.18918
f__Marinobacteraceae	0.474924	-0.0643342	0.379535	-0.247909	-0.168218		f__norank_o__Hydrothermarchaeales	-0.195312	-0.562957	-0.136882	0.286572	0.304131
f__norank_o__UBA10353_marine_group	-0.233616	-0.67505	-0.0725547	0.425733	0.456343		f__unclassified_k__norank_d__Archaea	-0.605001	0.11021	-0.548717	0.377819	0.184999
f__Hyphomonadaceae	-0.421181	0.121162	-0.376623	0.0959668	0.058691		f__norank_o__Group_1.1c	0.205402	-0.5604	0.227968	0.223063	0.271649
f__Alcanivoracaceae1	0.0831108	0.0209076	0.142383	0.00106768	-0.177625		f__Methanocellaceae	0.285835	0.203851	0.170859	-0.284912	-0.235994
f__Idiomarinaceae	0.38497	0.0310142	0.218559	0.00706064	-0.0234848		f__Methanomassiliicoccaceae	0.285835	0.203851	0.170859	-0.284912	-0.235994
f__Halomonadaceae	0.297693	0.429158	0.286654	-0.220159	-0.213947		f__Halomicrobiaceae	0.274654	-0.153903	0.301873	-0.0723034	-0.0730892
f__Beijerinckiaceae	0.0805627	0.23303	0.0198302	-0.110979	0.0314133		f__norank_o__Methanofastidiosales	-0.0918355	-0.572808	-0.117364	0.32123	0.21881
f__norank_o__norank_c__norank_p__SAR324_cladeMarine_group_B	-0.289456	-0.542868	-0.0987845	0.299335	0.27132		f__norank_o__Woesearchaeales	-0.351509	-0.126883	-0.423484	0.243264	0.0656848
f__Cyanobiaceae	-0.690627	0.112714	-0.580754	0.306251	0.247919		f__norank_o__Micrarchaeales	-0.166785	-0.562413	-0.198615	0.316302	0.263839
f__Pseudomonadaceae	0.153137	0.063046	0.194331	-0.369274	0.10777		f__norank_o__norank_c__norank_p__Halobacterota	-0.121713	-0.570101	-0.155717	0.288859	0.294169
f__Caulobacteraceae	-0.058036	0.410531	0.00237234	-0.110564	-0.137383		f__Halococcaceae	-0.30357	0.373269	-0.348464	0.0270807	-0.30379

## Sheet: Supplementary Table 4
Supplementary Table 4: Co-occurrence patterns of microbial populations based on Spearman’s correlation analysis table
	R	P	average	average weighted degree	average clustering coefficient
bacterial	>0.725	<0.05	1.918	1.419	0.043
archaeal	>0.725	<0.05	1.215	0.898	0.029
Bacterial
No	ASV	Zi	Pi	Phylum	Family
1	ASV84	2.236	0.652	Proteobacteria	Marinobacteraceae
2	ASV237	0.894	0.642	Proteobacteria	Pseudomonadaceae
3	ASV264	2.059	0.635	Actinobacteriota	Mycobacteriaceae
4	ASV28	0.223	0.65	SAR324_clade	SAR324_clade
5	ASV182	-0.447	0.625	Bacteroidota	Flavobacteriaceae
7	ASV16	-0.447	0.628	Proteobacteria	Sphingomonadaceae
8	ASV95	-0.447	0.656	Proteobacteria	Rhizobiaceae
9	ASV234	-0.894	0.625	Proteobacteria	Alteromonadaceae
Archaeal
No	ASV	Zi	Pi	Phylum	Family
1	ASV154	-1.004	0.75	Crenarchaeota	Nitrosopumilaceae
2	ASV156	-0.218	0.625	Thermoplasmatota	f_norank_o_norank_c_Thermoplasmata
Parameters
Missing data	Only fill with 0.01 in blanks with paired valid values
Transformation	Centered log-ratio transform
Similarity matrix	Pearson Correlation Coefficient
Calculation order	Decrease the cutoff from top
Scan speed	Regress Poisson distribution only
GBD-based RMT cutoffs	upper=0.58,best=0.56,lower=0.53

## Sheet: Supplementary Table 5
Supplementary Table 5: Functional prediction analysis table
Sample	methanol_oxidation	methylotrophy	aerobic_nitrite_oxidation	nitrification	sulfur_respiration	dark_sulfite_oxidation	thiosulfate_respiration	respiration_of_sulfur_compounds	nitrate_denitrification	nitrite_denitrification	nitrous_oxide_denitrification	denitrification	chitinolysis	knallgas_bacteria	dark_hydrogen_oxidation	nitrogen_fixation	nitrite_respiration	cellulolysis	xylanolysis	dark_sulfide_oxidation	dark_sulfur_oxidation	dark_thiosulfate_oxidation	dark_oxidation_of_sulfur_compounds	ligninolysis	fermentation	aerobic_chemoheterotrophy	human_pathogens_pneumonia	human_pathogens_all	fish_parasites	human_gut	mammal_gut	animal_parasites_or_symbionts	aromatic_hydrocarbon_degradation	aromatic_compound_degradation	aliphatic_non_methane_hydrocarbon_degradation	hydrocarbon_degradation	iron_respiration	nitrate_respiration	nitrate_reduction	nitrogen_respiration	fumarate_respiration	intracellular_parasites	chlorate_reducers	predatory_or_exoparasitic	cyanobacteria	anoxygenic_photoautotrophy_S_oxidizing	anoxygenic_photoautotrophy	oxygenic_photoautotrophy	photoautotrophy
CTD03_62	21	21	0	0	0	42	0	0	21	21	21	21	0	0	21	0	21	0	0	6	42	0	54	0	164	7816	0	685	2	0	0	687	2	657	38	283	0	70	99	70	0	60	0	22	704	14	19	704	723
CTD06_62	11	11	8	8	0	152	1	1	11	11	11	11	0	0	11	15	11	0	2	4	152	0	168	0	358	8091	0	564	0	0	0	564	0	583	98	164	0	50	63	50	0	86	0	64	416	39	169	416	585
CTD02_75	14	14	0	0	0	10	0	0	14	14	14	14	0	0	14	0	14	0	0	0	10	0	37	0	228	10556	0	292	0	0	0	292	0	296	208	290	0	60	102	60	0	13	0	169	311	0	6	311	317
CTD04_75	8	8	12	12	0	0	0	0	15	15	15	15	0	0	8	28	15	3	0	46	0	28	74	0	76	3493	1	285	4	0	0	289	0	274	24	130	0	71	75	71	0	99	0	39	947	40	40	947	987
CTD05_75	66	66	0	0	0	6	0	0	60	60	60	60	0	0	60	0	60	0	0	0	6	0	6	0	1982	8314	0	24	0	0	0	24	0	22	45	387	0	63	1900	63	0	134	0	6	690	25	32	690	722
CTD02_100	191	191	0	0	0	24	0	0	169	169	169	169	0	0	144	14	169	11	0	3	24	58	97	11	1003	10435	0	16	6	0	0	22	0	43	779	1304	0	255	327	255	0	100	0	30	21	0	517	21	538
CTD05_100	16	16	8	8	0	5	0	0	11	11	11	11	0	0	11	5	11	2	0	5	5	2	12	0	150	6801	0	58	0	0	0	58	0	98	264	638	0	20	35	20	0	82	0	13	664	21	21	664	685
CTD03_100	31	31	0	0	0	26	0	0	61	61	61	61	0	0	22	180	61	0	0	0	26	24	91	0	350	8900	0	1415	0	0	0	1415	0	416	165	678	0	1049	1065	1049	0	278	0	11	15	17	277	15	292
CTD05_125	0	0	10	10	0	5	0	0	21	21	21	21	0	0	0	1	21	0	0	54	5	1	60	0	135	10291	0	290	0	0	0	290	0	286	119	302	0	82	88	82	0	19	0	6	49	9	124	49	173
CTD06_125	9	9	156	156	0	21	0	0	9	9	9	9	0	0	12	3	9	0	0	48	21	0	74	0	136	7309	0	893	0	0	0	893	0	871	236	300	0	81	136	81	0	76	0	51	505	8	37	505	542
CTD03_150	0	0	633	633	0	0	0	0	0	0	0	0	0	0	0	0	0	0	0	217	0	0	217	0	103	3656	0	60	0	0	0	60	0	60	35	163	0	217	234	217	0	62	0	3	288	10	23	288	311
CTD06_150	7	7	424	424	0	0	0	0	7	7	7	7	0	0	7	0	7	0	0	35	0	0	35	0	337	8649	0	3594	0	0	0	3594	0	3561	53	74	0	75	75	75	0	43	0	0	155	3	309	155	464
CTD02_150	95	95	0	0	0	55	0	0	145	145	145	145	0	0	80	9	145	7	4	0	55	42	101	0	1298	10590	0	788	0	0	0	788	0	769	134	657	0	177	231	177	0	55	0	60	39	0	934	39	973
CTD03_200	0	0	123	123	0	0	0	0	28	28	28	28	0	0	0	3	28	0	0	252	0	3	255	0	69	1068	0	13	0	0	0	13	0	6	96	243	0	283	304	283	0	53	0	1	121	0	0	121	121
CTD04_200	31	31	118	118	0	17	0	0	156	156	156	156	0	0	31	3	156	0	0	85	17	3	105	0	549	6890	0	431	0	0	0	431	9	537	103	1066	0	259	308	259	0	24	0	5	174	9	9	174	183
CTD05_200	7	7	370	370	0	16	0	0	0	0	0	0	0	0	0	15	0	0	0	69	16	2	90	0	91	1681	0	140	0	0	0	140	0	251	2	69	0	76	93	76	0	30	0	12	74	0	19	74	93
CTD06_200	17	17	67	67	0	8	0	0	65	65	65	65	0	0	17	0	65	0	0	134	8	37	181	0	1061	7544	0	1480	0	0	0	1490	0	1486	87	218	0	204	214	204	0	126	0	18	6	29	873	6	879
CTD02_300	53	53	0	0	0	45	6	6	70	70	70	70	3	51	120	0	70	0	0	0	45	0	45	0	2595	6371	21	507	0	36	36	980	190	698	383	1033	18	262	858	262	5	12	23	41	0	0	0	0	0
CTD03_300	0	0	95	95	0	4	0	0	6	6	6	6	0	0	0	0	6	0	0	217	4	0	221	0	109	4587	0	58	0	0	0	58	0	86	62	754	0	223	266	223	0	22	0	3	10	0	0	10	10
CTD06_300	4	4	212	212	0	0	0	0	17	17	17	17	0	0	4	5	17	0	0	1213	0	0	1213	0	84	5076	0	515	0	0	0	515	0	493	7	99	0	1248	1268	1248	0	82	0	32	176	6	48	176	224
CTD02_500	74	74	0	0	22	38	0	22	85	85	85	85	0	3	68	0	85	0	0	0	38	0	72	0	3303	7523	0	22	0	20	20	53	0	36	70	1115	22	90	187	90	0	64	0	12	54	0	27	54	81
CTD03_500	9	9	31	31	0	0	0	0	8	8	8	8	0	0	0	6	8	0	0	57	0	6	63	0	456	8813	0	5	0	0	0	5	0	9	343	609	0	65	359	65	0	30	0	2	516	3	3	516	519
CTD05_500	0	0	329	329	0	8	0	0	32	32	32	32	0	0	0	0	32	6	0	54	8	0	62	6	124	6081	0	410	0	0	0	410	8	404	52	240	0	106	137	106	0	33	0	32	109	0	0	109	109
CTD06_500	7	7	262	262	0	15	0	0	306	306	306	306	0	0	5	12	306	18	0	120	15	12	147	18	268	6970	0	603	0	0	0	603	0	635	82	764	0	456	485	456	0	66	0	14	212	0	15	212	227
CTD02_1000	3	3	0	0	0	0	0	0	6	6	6	6	0	0	3	0	6	0	0	8	0	0	15	0	58	11605	0	886	0	0	0	886	0	695	446	493	0	214	265	214	0	16	0	39	3	0	0	3	3
CTD04_1000	0	0	109	109	0	23	0	0	4	4	4	4	0	0	0	3	4	0	0	101	23	3	127	0	114	8529	0	263	0	0	0	263	0	258	184	1126	0	111	119	111	0	36	0	39	193	0	5	193	198
CTD05_1000	0	0	94	94	0	8	0	0	0	0	0	0	0	0	0	3	0	0	0	107	8	3	129	0	84	9815	0	1300	0	0	0	1300	3	1112	364	426	0	308	331	308	0	49	0	0	11	5	5	11	16
CTD06_1000	1	1	0	0	0	0	0	0	35	35	35	35	0	0	0	0	35	0	0	22	0	0	22	0	159	10919	0	106	0	0	0	106	0	657	36	302	0	57	217	57	0	8	0	67	18	0	0	18	18
CTD06_1500	7	7	90	90	0	0	0	0	9	9	9	9	0	0	7	0	9	0	0	59	0	0	61	0	91	7670	0	33	0	0	0	33	0	36	359	413	0	68	117	68	0	10	0	17	10	3	3	10	13
CTD03_2000	25	25	5	5	0	10	0	0	29	29	29	29	0	0	25	4	29	0	0	0	10	0	10	0	138	10751	0	180	0	0	0	180	0	180	250	1341	0	35	56	35	0	12	0	10	179	0	13	179	192
CTD05_2000	19	19	16	16	0	17	0	0	19	19	19	19	0	0	18	24	19	29	0	13	17	2	47	29	162	8919	0	756	0	0	0	756	0	771	116	654	0	42	110	42	0	23	0	174	229	0	5	229	234
CTD06_2000	2	2	41	41	0	7	0	0	14	14	14	14	0	0	19	4	14	0	0	14	7	0	27	0	315	9392	0	1209	0	4	4	1213	22	1232	38	592	0	33	258	33	0	29	0	228	30	0	0	30	30
CTD02_3000	73	73	0	0	0	7	0	0	66	66	66	66	22	1	67	48	66	22	0	0	7	0	31	0	5601	4158	0	80	0	0	0	1253	36	124	84	807	0	107	1596	107	6	0	0	67	0	0	14	0	14
CTD03_3000	142	142	2	2	0	57	0	0	69	69	69	69	0	0	69	3	69	8	0	6	57	4	67	7	255	7761	0	1816	0	0	0	1816	0	2001	193	1235	0	87	98	87	0	40	0	0	27	0	2	27	29
CTD05_3000	38	38	7	7	0	12	0	0	29	29	29	29	0	0	31	25	29	18	0	11	12	18	45	0	155	9803	0	897	0	0	0	897	17	936	314	672	0	89	151	89	0	128	0	25	6	0	6	6	12
CTD06_3000	27	27	3	3	0	16	0	0	25	25	25	25	0	0	34	14	25	0	0	0	16	0	19	0	45	10933	0	2252	0	0	0	2252	0	1990	64	431	0	346	400	346	0	37	0	70	17	0	7	17	24
CTD02_4000	47	47	0	0	0	35	0	0	21	21	21	21	0	0	21	0	21	0	0	0	35	0	35	0	397	11553	0	244	0	0	0	244	0	248	56	997	0	48	377	48	0	8	0	8	87	0	1	87	88
[truncated: 5 more columns]
